# Supplementary material
Source: PubMed Central journal article supplement (PMC7391367)
Supplement: ao0c01463_si_001.pdf [file ao0c01463_si_001.pdf]

# Novel disulfide-bridged bio-responsive antisense oligonucleotide induces efficient splice-modulation in muscle myotubes *in vitro*

Bao T. Le,<sup>a,b</sup> Tamer R. Kosbar <sup>a,b</sup> and Rakesh N. Veedu <sup>\*a,b</sup>

<sup>a</sup> Centre for Molecular Medicine and Innovative Therapeutics, Murdoch University, Perth, Australia-6150.

<sup>b</sup> Perron Institute for Neurological and Translational Science, Perth, Australia-6009.

R.Veedu@murdoch.edu.au

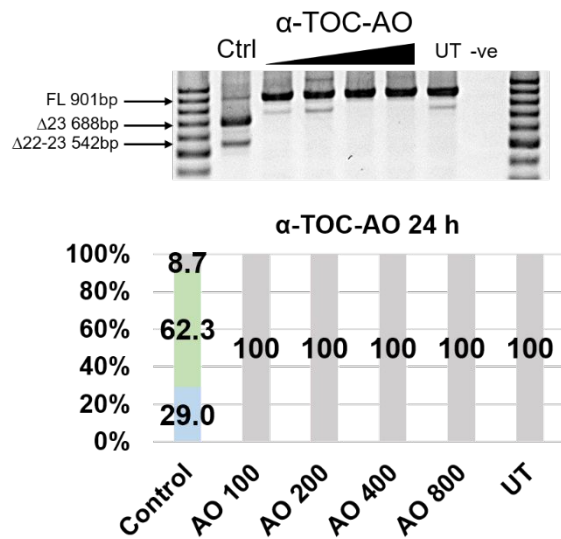

**Figure S1.** RT-PCR and transcript densitometry analysis of RNA prepared from *H2K mdx* mouse myotubes incubated with  $\alpha$ -TOC-AO at 24 h timepoint.

The triangles above the gel image indicate increasing AO concentration (100, 200, 400 and 800 nM); Ctrl = control AO transfected with Lipofectin at 100 nM, UT = untreated, -ve = negative control.

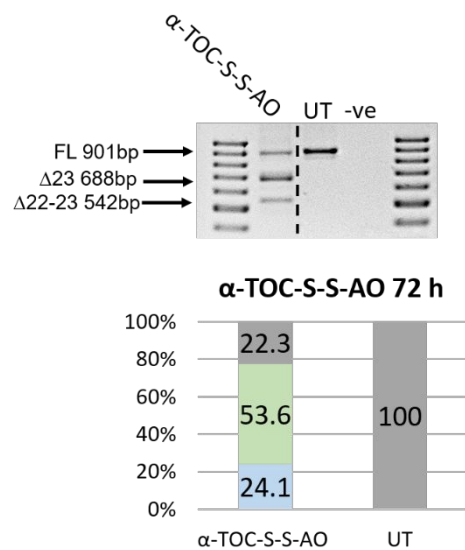

**Figure S2.** RT-PCR and transcript densitometry analysis of RNA prepared from *H2K mdx* mouse myotubes transfected with  $\alpha$ -TOC-S-S-AO at 400 nM using Lipofectin at 72 h timepoint; UT = untreated, -ve = negative control.
